# Supplementary material for: Green synthesis of hierarchical carbon coupled with Fe3O4/Fe2C as an efficient catalyst for the oxygen reduction reaction
Source: Royal Society of Chemistry journal article supplement (doi:10.1039/d0ma00454e), 2020-01-01
Supplement: d0ma00454e1.pdf [file d0ma00454e1.pdf]

Supporting Information

**Green Synthesis of Hierarchical Carbon Coupled with Fe<sub>3</sub>O<sub>4</sub>/Fe<sub>2</sub>C as Efficient Catalyst for Oxygen Reduction Reaction**

Ling Zhang<sup>a†</sup>, Lili Fan<sup>a†\*</sup>, Pu Yang<sup>a</sup>, Mengfei Li<sup>a</sup>, Haobing Zhang<sup>a</sup>, Yucheng Tang<sup>a</sup>, Zixi Kang<sup>a</sup>, Hailing Guo<sup>b</sup>,  
Rongming Wang<sup>a\*</sup> and Daofeng Sun<sup>a</sup>

<sup>a</sup> School of Materials Science and Engineering, College of Science, China University of Petroleum (East China), Qingdao 266580, P. R. China

<sup>b</sup> State Key Laboratory of Heavy Oil Processing, Key Laboratory of Catalysis, China National Petroleum Corp. (CNPC), China University of Petroleum (East China), Qingdao 266580, P. R. China.

\* Corresponding author (email: lilifan@upc.edu.cn; rmwang@upc.edu.cn)

† These authors contributed equally to this work.

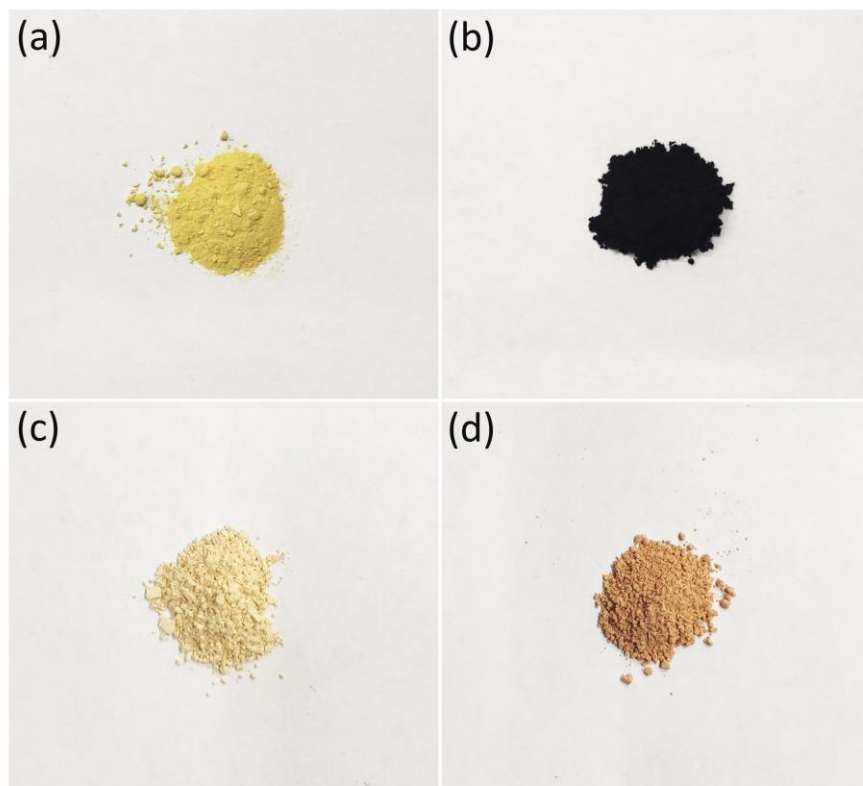

**Fig. S1** Digital photos of (a) BM-Fe@NC-120 precursor, (b) BM-Fe@NC-120, (c) BM-IM-120 and (d) Fe-MIL-101 from hydrothermal synthesis.

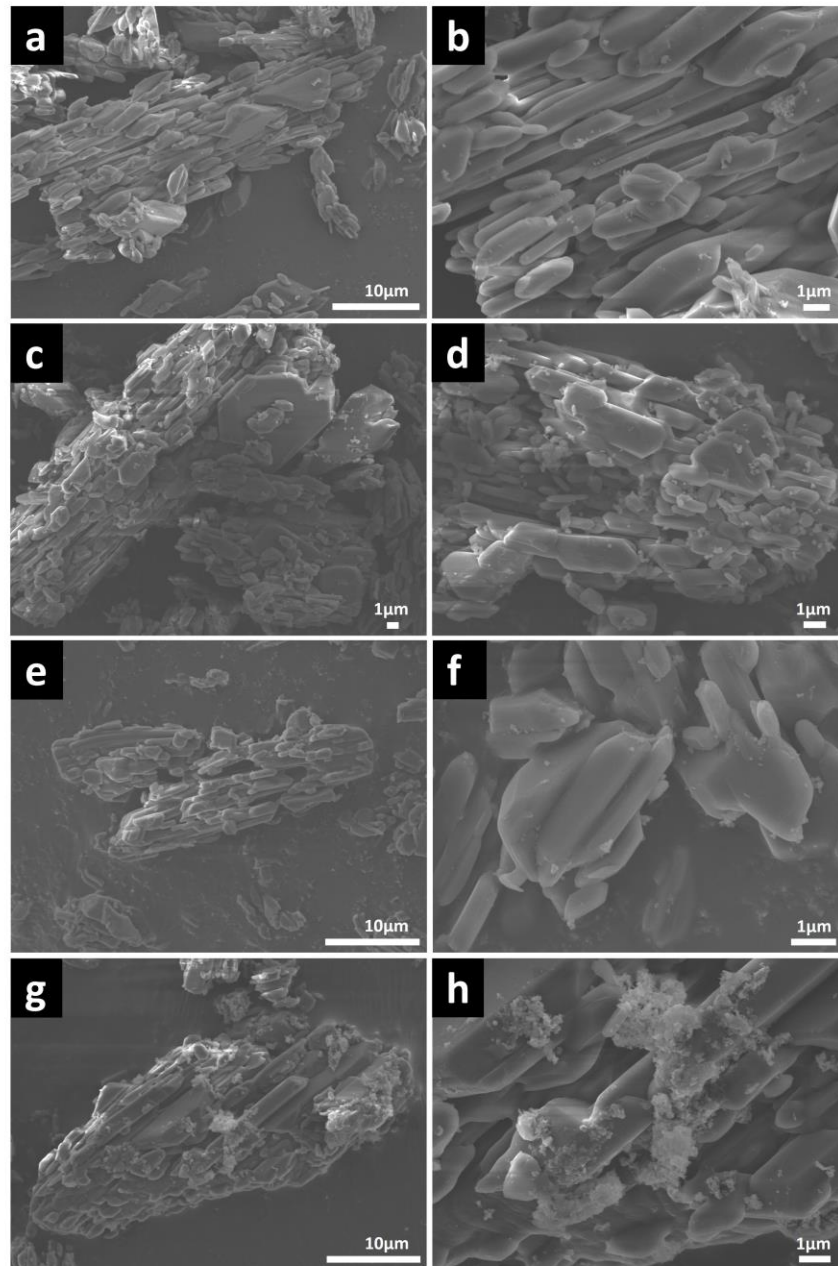

**Fig. S2** Different magnification SEM images of (a-b) BM-IM-30, (c-d) BM-IM-60, (e-f) BM-IM-90 and (g-h) BM-IM-150.

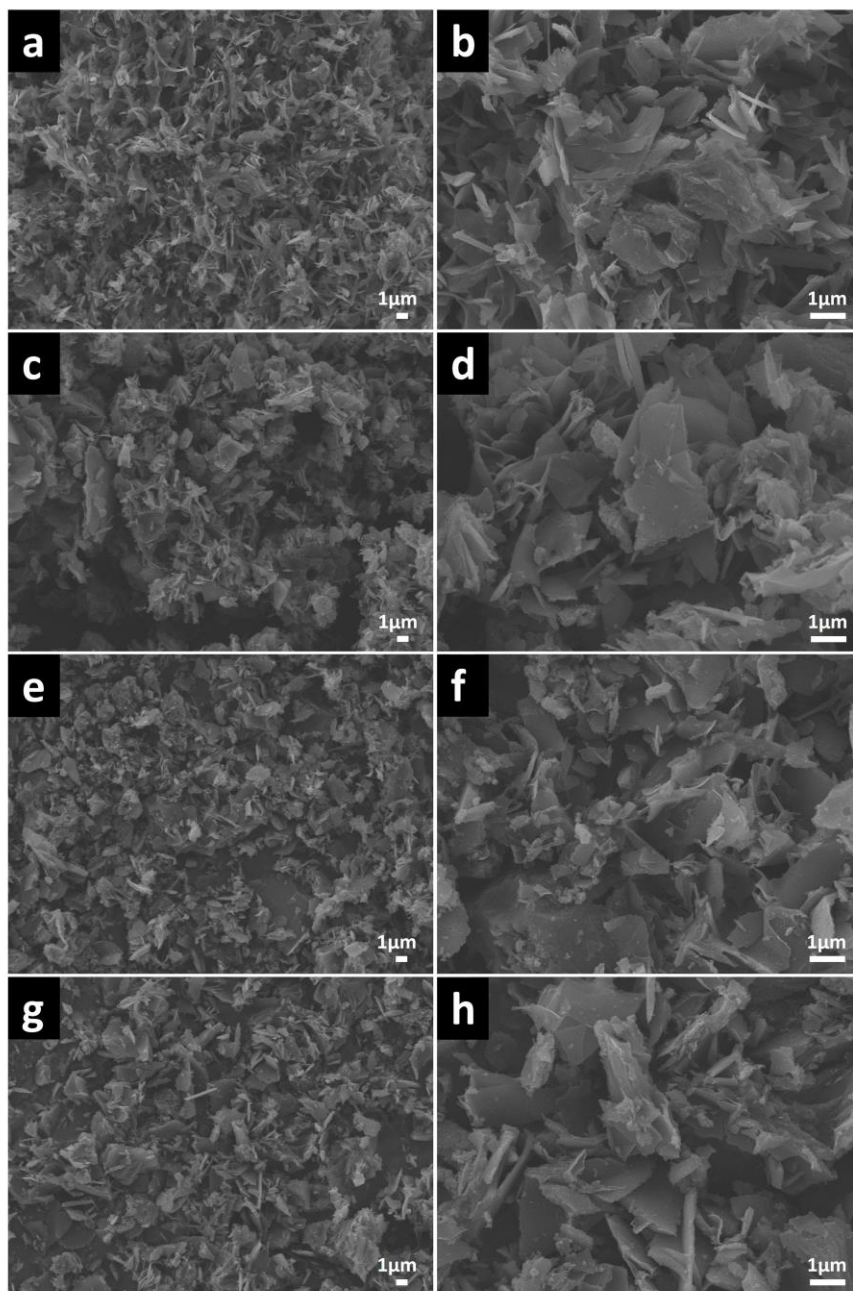

**Fig. S3** Different magnification SEM images of (a-b) BM-Fe@NC-30, (c-d) BM-Fe@NC-60, (e-f) BM-Fe@NC-90 and (g-h) BM-Fe@NC-150.

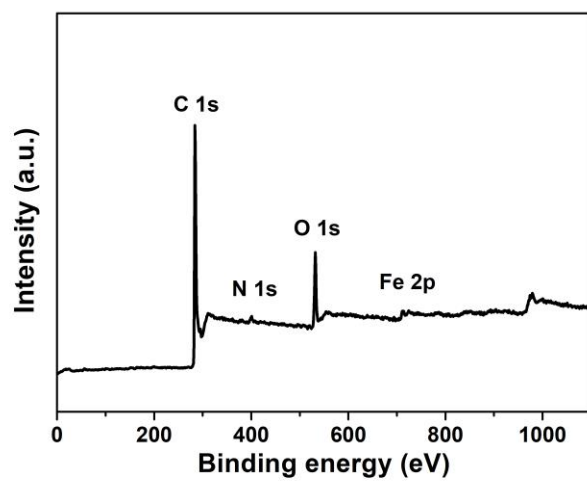

**Fig. S4** XPS survey spectrum of BM-Fe@NC-120.

**Table S1** XPS results of the surface elemental composition of BM-Fe@NC-120.

| Element  | C     | N    | O     | Fe   |
|----------|-------|------|-------|------|
| Atomic % | 85.27 | 1.89 | 12.01 | 0.84 |

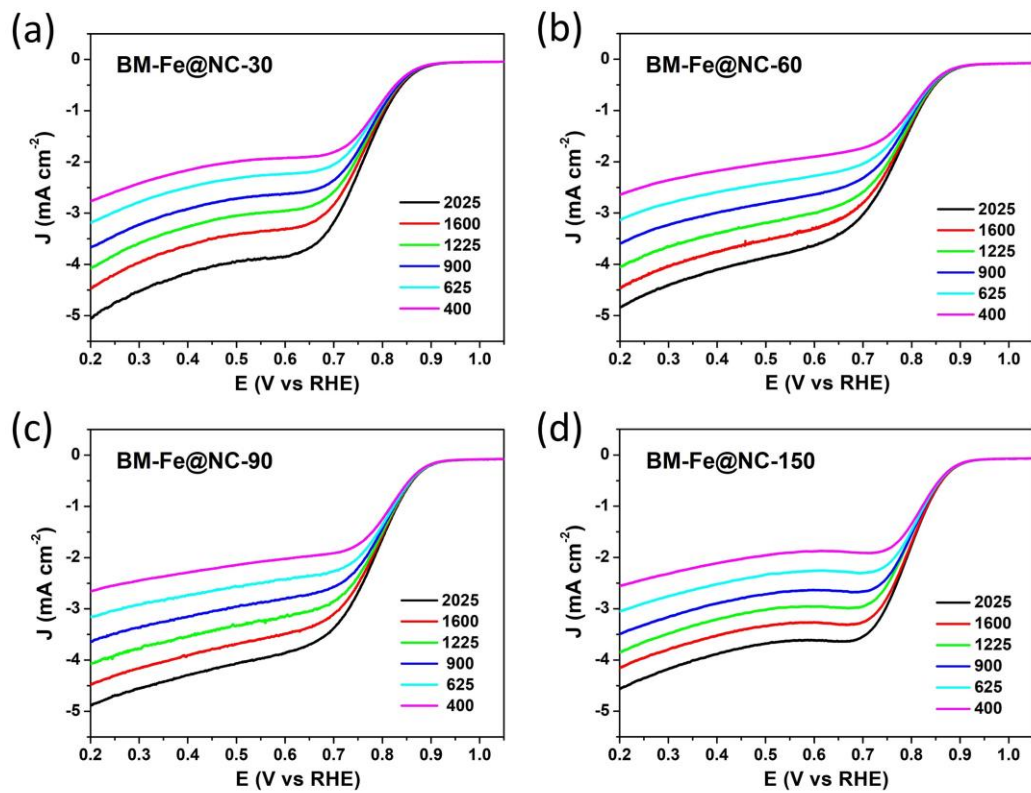

**Fig. S5** LSV curves of (a) BM-Fe@NC-30, (b) BM-Fe@NC-60, (c) BM-Fe@NC-90 and (d) BM-Fe@NC-150 at different rotation rates.

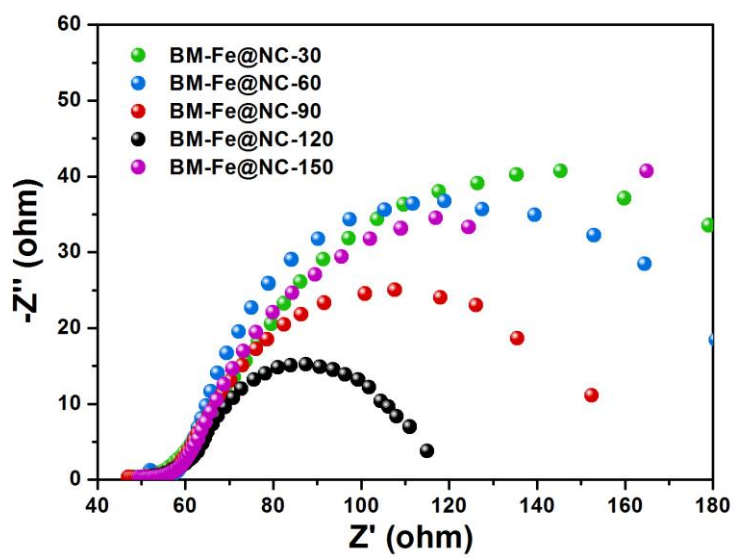

**Fig. S6** Nyquist plots of BM-Fe@NC-30, BM-Fe@NC-60, BM-Fe@NC-90, BM-Fe@NC-120 and BM-Fe@NC-150.

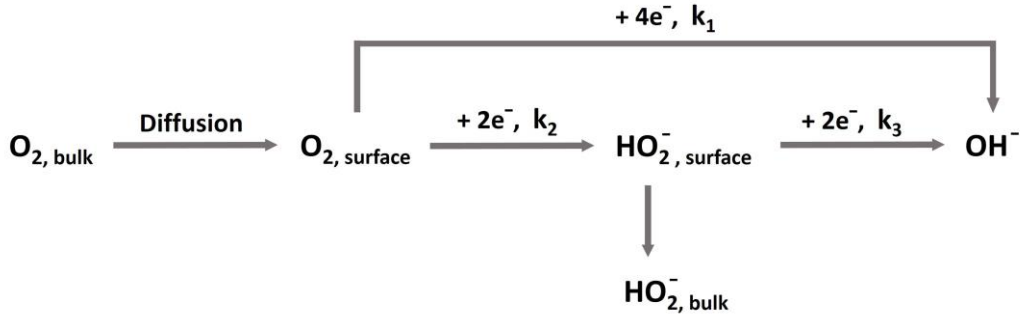

**Scheme 1** Reaction scheme for the electrochemical reduction of oxygen in alkaline medium.

The following series of Equations proposed by Damjanovic *et al.* and Hsueh *et al.* were used to calculate the rate constants  $k_1$ ,  $k_2$  and  $k_3$  for BM-Fe@NC-90, BM-Fe@NC-120 and BM-Fe@NC-150:

$$\text{For } O_2^*: z_1 \omega^{1/2} (c_{1b} - c_1^*) - (k_1 + k_2) c_1^* = 0 \quad (S1)$$

$$\text{For } H_2O_2: k_2 c_1^* - (k_3 + z_2 \omega^{1/2}) c_2^* = 0 \quad (S2)$$

$$I_d = 2S_D F [(2k_1 + k_2) c_1^* + k_3 c_2^*] \quad (S3)$$

$$I_r = 2S_D F N Z_2 \omega^{1/2} c_2^* \quad (S4)$$

$$c_1^* = c_{1b} \left[ 1 - \frac{I_r / N + I_d}{I_{rl} / N + I_{dl}} \right]$$

As  $I_r \ll I_d, I_d \ll I_{dl}$ , the equation simplified to:

$$c_1^* = c_{1b} \left[ 1 - \frac{I_d}{I_{dl}} \right]$$

$$\frac{I_d}{I_r} = \frac{1+2k_1/k_2}{N} + \frac{2(1+k_1/k_2)}{Nz_2} k_3 \omega^{-1/2} \quad (S5)$$

$$\frac{I_{dl}}{I_{dl} - I_d} = 1 + \frac{k_1 + k_2}{z_1} \omega^{-1/2} \quad (S6)$$

$$k_1 = Z_1 S_2 \frac{I_1 N - 1}{I_1 N + 1} \quad (S7)$$

$$k_2 = \frac{2Z_1 S_2}{I_1 N + 1} \quad (S8)$$

$$k_3 = \frac{N Z_2 S_1}{I_1 N + 1} \quad (S9)$$

where  $I_d$  is the disk current,  $I_r$  is the ring current,  $I_{dl}$  is the disk diffusion limited current determined by RDE treatment,  $I_1$  and  $S_1$  are respectively the intercept and slope of the plot of  $I_d/I_r$



vs  $\omega^{-1/2}$ ,  $S_2$  is the slope of the plot of  $\frac{I_{dl}}{I_{dl}-I_d}$  vs  $\omega^{-1/2}$ ,  $Z_1 = 0.2D_{O_2}^{2/3}v^{-1/6}$  and  $Z_2 = 0.2D_{H_2O_2}^{2/3}v^{-1/6}$ . The  $D_{H_2O_2}$  presents the diffusion coefficient of  $H_2O_2$  ( $D_{H_2O_2} = 1.18 \times 10^{-5} cm^2 s^{-1}$  in 0.1 M KOH)

**Table S2** Comparison of the electrocatalytic performance of BM-Fe@NC-120 with other reported carbon materials in 0.1 M KOH solution.

| Catalysts                              | Half-wave Potential (V) | Current density (mA cm <sup>-2</sup> ) | Onset Potential (V) | Electron transfer number | Reference                        |
|----------------------------------------|-------------------------|----------------------------------------|---------------------|--------------------------|----------------------------------|
| CoO@Co/N-rGO                           | 0.81                    | 4.6                                    | 0.95                | 3.97                     | J. Mater. Chem. A, 2017 [1]      |
| Co <sub>9</sub> S <sub>8</sub> /C      | 0.778                   | --                                     | 0.892               | 3.7                      | Nanoscale, 2019 [2]              |
| Fe-N-CNTs                              | 0.784                   | 5.443                                  | 0.980               |                          | Appl. Surf. Sci., 2019 [3]       |
| Co-C <sub>3</sub> N <sub>4</sub> /CNT  | 0.83                    | 5                                      | 0.9                 | 4                        | J. Am. Chem. Soc., 2017 [4]      |
| Fe <sub>3</sub> O <sub>4</sub> @NHCS   | 0.875                   | 5.85                                   | --                  | 4.02                     | Nano Res., 2019 [5]              |
| Fe-N <sub>x</sub> -C                   | 0.91                    | 5.44                                   | 1.05                | 3.9                      | Adv. Funct. Mater., 2018 [6]     |
| CIAC-126&CMK                           | 0.786                   | 3.86                                   | 0.874               | 3.76                     | ACS Appl. Nano Mater. 2019 [7]   |
| Co/CoP-HNC                             | 0.82                    | 7.78                                   | 0.95                | 4.0                      | Mater. Horiz., 2018 [8]          |
| CoNC-CNF                               | 0.80                    | 5.9                                    | --                  | 3.96                     | Small, 2018 [9]                  |
| Co@Co <sub>3</sub> O <sub>4</sub> /N-C | 0.81                    | 5.5                                    | 0.89                | 3.83                     | Chem. Commun., 2018 [10]         |
| C@CoC <sub>x</sub>                     | 0.8                     | 5.4                                    | 0.92                | 3.92                     | ACS Appl. Nano Mater., 2019 [11] |
| Cu@Cu-N-C                              | 0.85                    | 5.4                                    | 0.97                | 3.9                      | Small, 2019 [12]                 |
| BM-Fe@NC-120                           | 0.80                    | 5.08                                   | 0.89                | 3.95                     | This work                        |

### References:

1. X. X. Liu, J. B. Zang, L. Chen, L. B. Chen, X. Chen, P. Wu, S. Y. Zhou and Y. H. Wang, *J. Mater. Chem. A*, 2017, **5**, 5865-5872.
2. L. Li, H. G. Li Song, W. Xia, C. Jiang, B. Gao, C. Wu, T. Wang and A. J. He, *Nanoscale*, 2019, **11**, 901-

907.

3. Z. Lu, B. Liu, W. Dai, L. Ouyang and J. Ye, *Appl. Surf. Sci.*, 2019, **463**, 767-774.
4. Y. Zheng, Y. Jiao, Y. Zhu, Q. Cai, A. Vasileff, L. H. Li, Y. Han, Y. Chen and S. Qiao, *J. Am. Chem. Soc.*, 2017, **139**, 3336-3339.
5. Y. Li, H. Huang, S. Chen, X. Yu, C. Wang and T. Ma, *Nano Res.*, 2019, **12**, 2774-2780.
6. J. Han, X. Meng, L. Lu, J. Bian, Z. Li and C. Sun, *Adv. Funct. Mater.*, 2019, **29**, 1808872.
7. X. Hang, W. Yang, S. Wang, H. Han, W. Liao and J. Jia, *ACS Appl. Nano Mater.*, 2019, **2**, 4232-4237.
8. Y. Hao, Y. Xu, W. Liu and X. Sun, *Mater. Horiz.*, 2018, **5**, 108-115.
9. W. Zhang, X. Yao, S. Zhou, X. Li, L. Li, Z. Yu and L. Gu, *Small*, 2018, **14**, 1800423.
10. Y. Wang, T. Hu, Y. Qiao, Y. Chen and L. Zhang, *Chem. Commun.*, 2018, **54**, 12746-12749.
11. S.A. Rasaki, H. Shen, T. Thomas and M. Yang, *ACS Appl. Nano Mater.*, 2019, **2**, 3662-3670.
12. T. Wang, R. Yang, N. Shi, J. Yang, H. Yan, J. Wang, Z. Ding, W. Huang, Q. Luo, Y. Lin, J. Gao and M. Han, *Small*, 2019, **15**, 1902410.
